# Supplementary material for: High resolution X-ray and NMR structural study of human T-cell immunoglobulin and mucin domain containing protein-3
Source: PubMed Central journal article supplement (PMC6269442; doi:10.1038/s41598-018-35754-0), 2018-11-30
Supplement: 41598_2018_35754_MOESM1_ESM.pdf [file 41598_2018_35754_MOESM1_ESM.pdf]

# High resolution X-ray and NMR structural study of human T-cell immunoglobulin and mucin domain containing protein-3

Amit K. Gandhi<sup>1,10</sup>, Walter M. Kim<sup>1,10</sup>, Zhen-Yu J. Sun<sup>2,6,10</sup>, Yu-Hwa Huang<sup>1</sup>, Daniel A. Bonsor<sup>3</sup>, Eric J. Sundberg<sup>3,7,8</sup>, Yasuyuki Kondo<sup>1,9</sup>, Gerhard Wagner<sup>2</sup>, Vijay K. Kuchroo<sup>4</sup>, Gregory Petsko<sup>5</sup>, Richard S. Blumberg<sup>1,\*</sup>

<sup>1</sup> Division of Gastroenterology, Department of Medicine, Brigham and Women's Hospital, Harvard Medical School, 75 Francis Street, Boston, MA 02115, USA.

<sup>2</sup> Department of Biological Chemistry and Molecular Pharmacology, Harvard Medical School, 240 Longwood Avenue, MA 02115, USA.

<sup>3</sup> Institute of Human Virology, University of Maryland School of Medicine, University of Maryland, 725 W Lombard St, Baltimore, MD 21201, USA.

<sup>4</sup> Evergrande Center for Immunologic Diseases and Ann Romney Center for Neurologic Diseases, Harvard Medical School and Brigham and Women's Hospital, 77 Avenue Louis Pasteur, Boston, MA 02115, USA.

<sup>5</sup> Department of Neurology and Feil Family Brain and Mind Research Institute, Weill Cornell Medical College, New York, NY 10021, USA.

<sup>6</sup> Current address: Department of Cancer Biology, Dana-Farber Cancer Institute, Boston, MA 02215, USA

<sup>7</sup> Department of Medicine, University of Maryland School of Medicine, University of Maryland, Baltimore, MD 21201, USA.

<sup>8</sup> Department of Microbiology and Immunology, University of Maryland School of Medicine, University of Maryland, Baltimore, MD 21201,USA.

<sup>9</sup> Current address: Division of Gastroenterology, Department of Internal Medicine, Graduate School of Medicine, Kobe University, Kobe, 650-0017, Japan.

<sup>10</sup> These authors contributed equally to this work.

\* To whom correspondence should be addressed: [rblumberg@bwh.harvard.edu](mailto:rblumberg@bwh.harvard.edu).

# Supplementary Figure 1

a

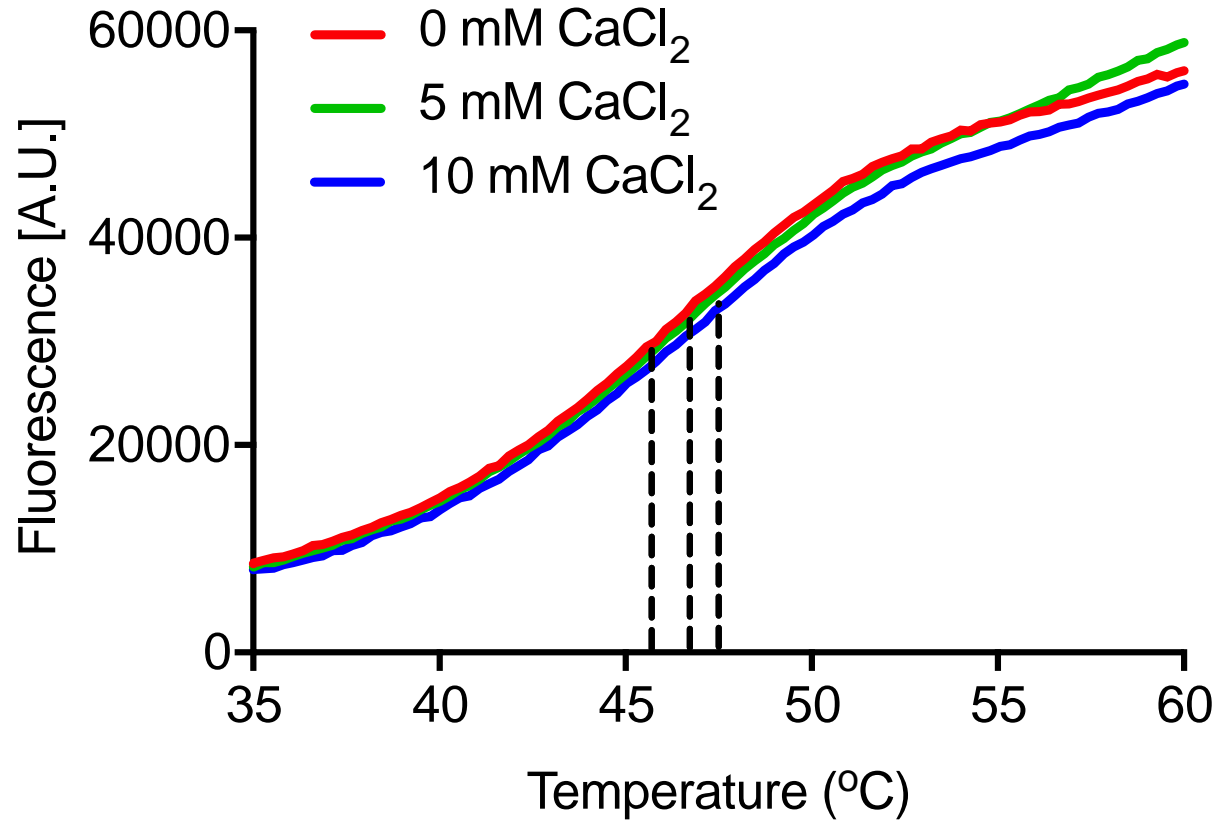

b

| Additive                | T <sub>m</sub> (°C) [Std Error] |
|-------------------------|---------------------------------|
| 0 mM CaCl <sub>2</sub>  | 45.72 [ $\pm$ 0.200]            |
| 5 mM CaCl <sub>2</sub>  | 46.71 [ $\pm$ 0.104]            |
| 10 mM CaCl <sub>2</sub> | 47.51 [ $\pm$ 0.180]            |

# Supplementary Figure 2

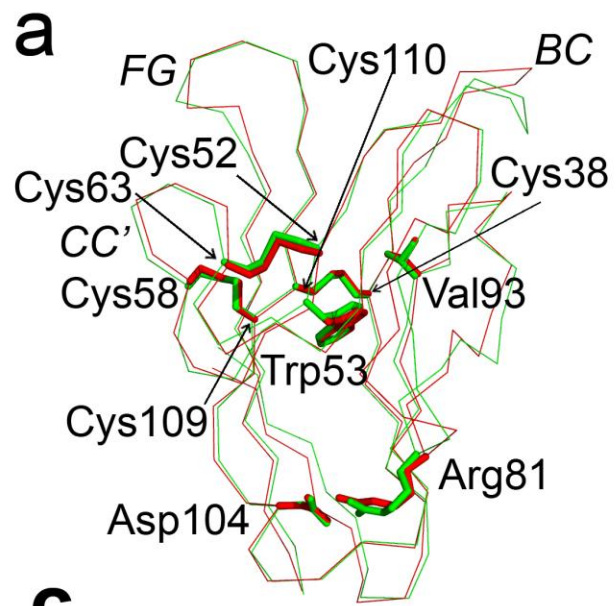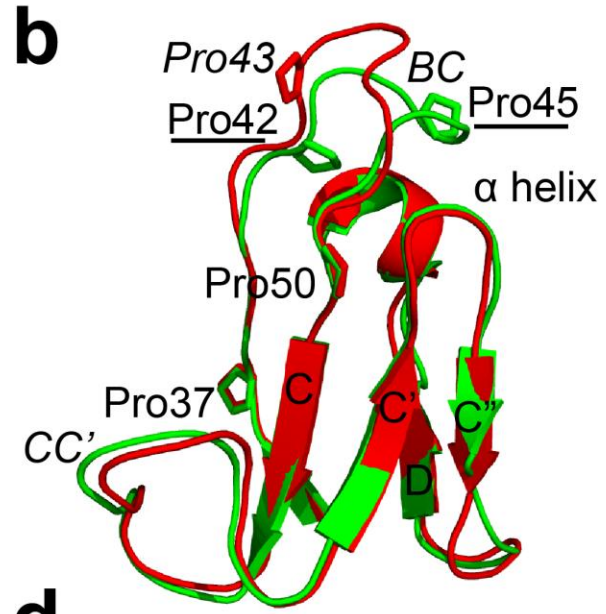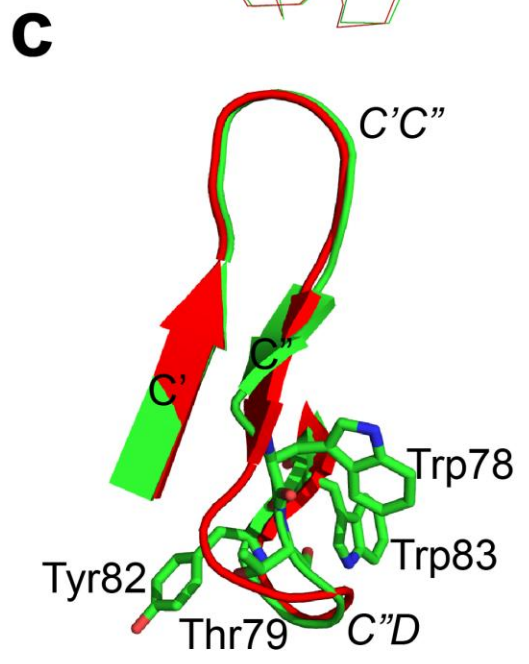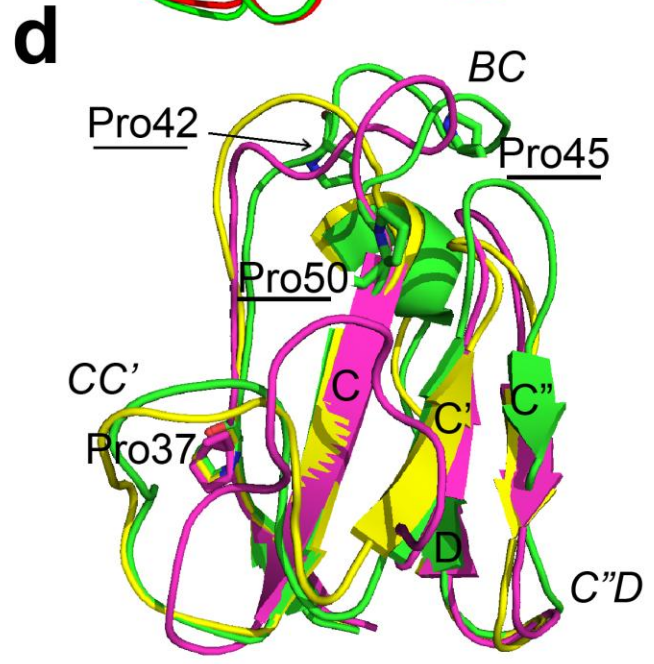

# Supplementary Figure 3

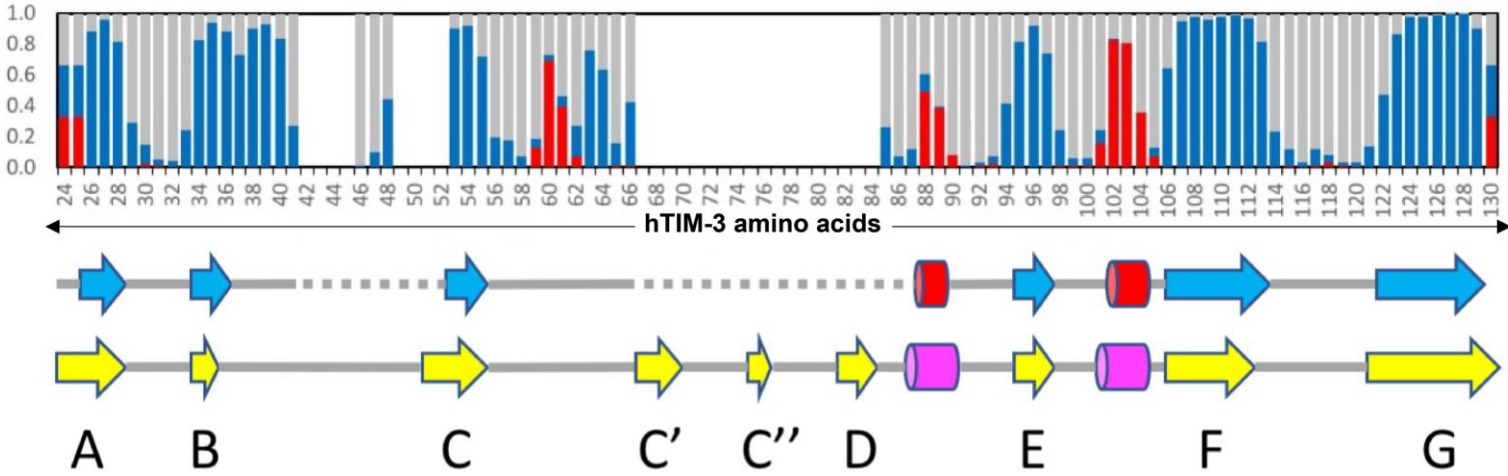

# Supplementary Figure 4

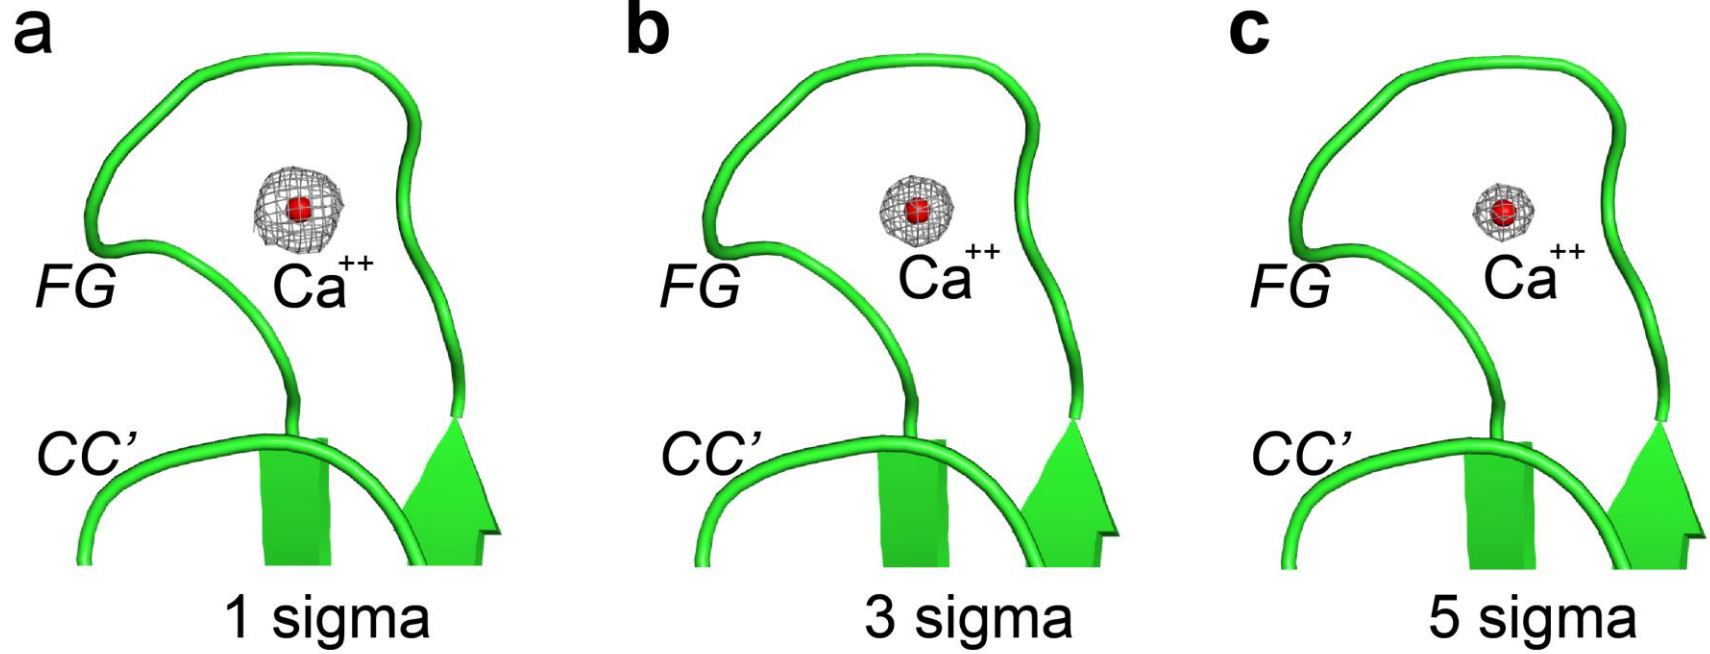

# Supplementary Figure 5

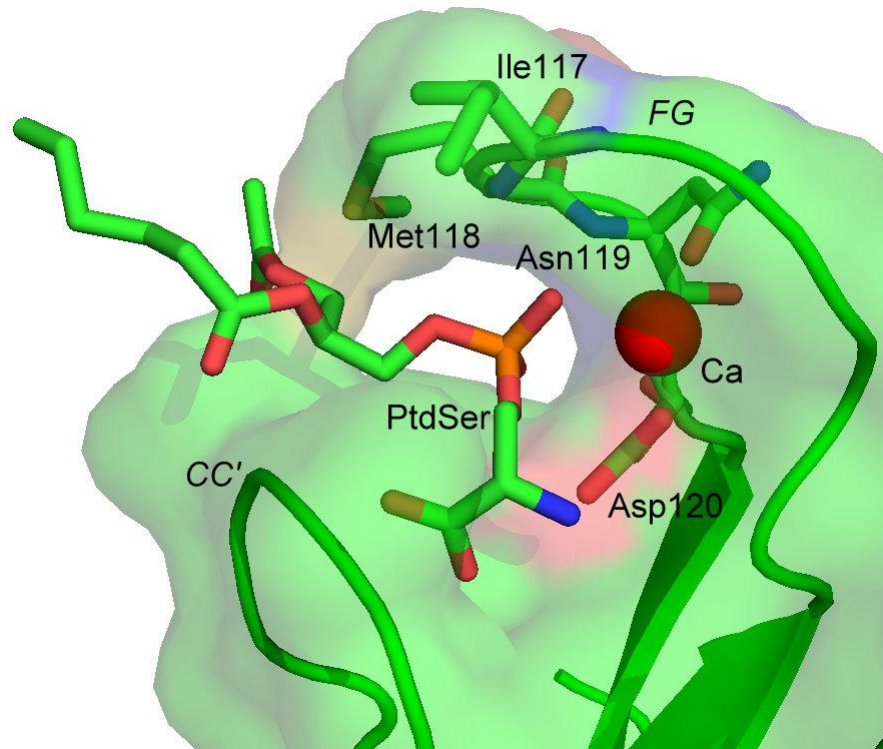

# Supplementary Figure 6

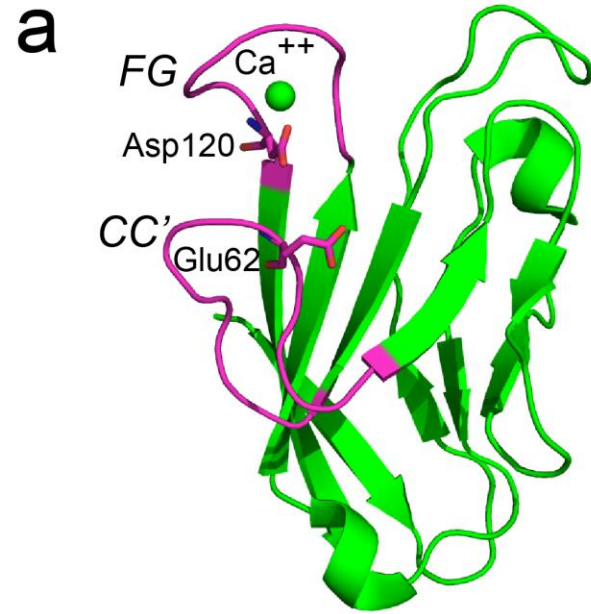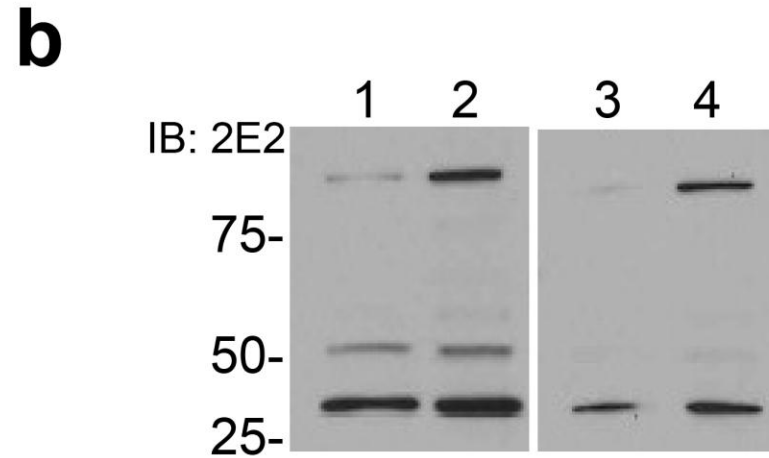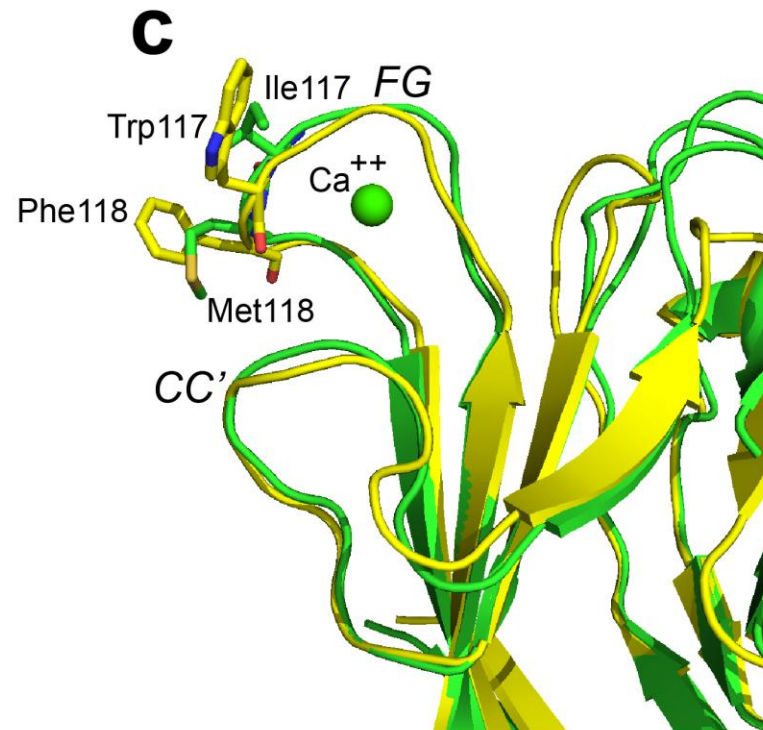



# Supplementary Figure 7

Scrambled control  
peptide

hTIM-3 C-C' loop-derived  
peptide

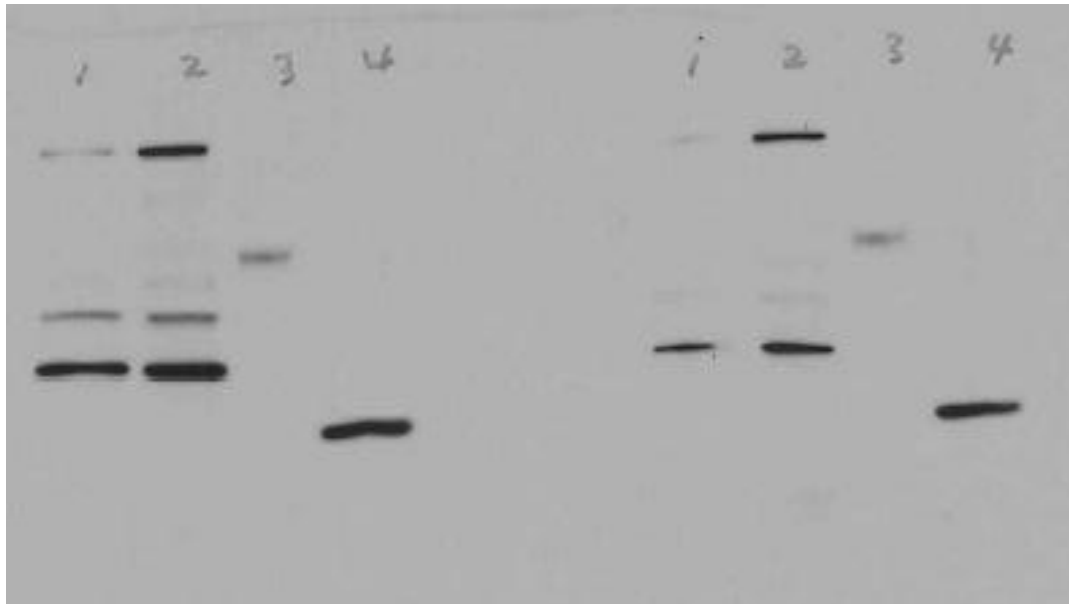

**Supplementary Figure 1. Differential scanning fluorimetry of Ca<sup>++</sup>-bound hTIM-3 IgV. (a)** Fluorescence emission with corresponding temperature is plotted for hTIM-3 in the absence (0mM) or presence (5mM, 10mM) of CaCl<sub>2</sub>. Extrapolated melting temperature ( $T_m$ ) from the Boltzmann method is depicted in dashed lines for each protein sample. **(b)** Calculated Boltzmann melting temperatures of the fluorescence emission for each corresponding hTIM-3 sample is shown with experimental standard errors from triplicate samples.

**Supplementary Figure 2. Structural comparison of hTIM-3, mTIM-3, hTIM-1, and hTIM-4 IgV domains. a,** Line diagram of aligned mTIM-3 (Red, PDB code 2OYP) and hTIM-3 IgV (Green, PDB code 6DHB) domains with conserved residues Cys52, Trp53, Cys58, Cys63, Arg81, Val93, Asp104, Cys109, and Cys110 shown in sticks. **b,** B-C loop conformational differences between mTIM-3 (red) and hTIM-3 (green). The conserved Pro37 and Pro50 shown in stick. mTIM-3 residue Pro43 is labeled in italics, and hTIM-3 residues Pro42 and Pro45 are labeled and underlined. **c,** Conformational differences in C'' strand and C''-D loop of hTIM-3 (green) and mTIM-3. The hTIM-3 residues Trp78, Thr79, Tyr82, and Trp83 shown in sticks. **d,** B-C and C''-D loop conformation differences among human TIM family, where three additional proline residues (Pro42, Pro45, Pro50) in B-C loop of hTIM-3 (green) are labeled and underlined. Pro37 is labeled and conserved in hTIM-1 (yellow), hTIM-3 (green) and hTIM-4 (magenta).

**Supplementary Figure 3. Secondary structural comparison of hTIM-3 based on NMR and crystal structure.** Top bar diagram shows secondary structure predictions (TALOS+) of hTIM-3 based on  $^{15}\text{N}/^{13}\text{C}$  chemical shift values determined by NMR, defined as fractional probabilities for helix (red), beta-sheet (blue), and loop (gray) respectively. Middle cartoon diagram shows helices colored in red, beta-sheets colored in blue and loops colored in gray based on the TALOS+ secondary structure predictions. Bottom cartoon diagram shows helices colored in pink, beta-sheets colored in yellow and loops colored in gray based on hTIM-3 crystal structure.

**Supplementary Figure 4: Human TIM-3 GFCC' face with bound  $\text{Ca}^{++}$ .** 2Fo-Fc map is shown at bound  $\text{Ca}^{++}$  (red sphere) with 1.0  $\sigma$  (a), 3.0  $\sigma$  (b) and 5.0  $\sigma$  (c) levels. Map is superimposed on the final refined model.

**Supplementary Figure 5. Structural model of human TIM-3 with bound  $\text{Ca}^{++}$  and modeled PtdSer.** hTIM-3 F-G loop residues Asn119 and Asp120 participates in binding with  $\text{Ca}^{++}$  and PtdSer. Residues Ile117 and Met118 of hTIM-3 do not participate significantly in PtdSer binding with hTIM-3.

**Supplementary Figure 6. Structural mapping and selectivity of anti-human TIM-3 2E2 antibody.** **a**, hTIM-3 C-C' and FG loops that contribute to binding of anti-human TIM-3 2E2 antibody as previously determined<sup>1</sup> is highlighted in magenta on a representation of the hTIM-3 crystal structure reported here (PDB code 6DHB) which includes residues Glu62 and Asp120. Bound Ca<sup>++</sup> is shown by a green sphere. **b**, hTIM-3 C-C' loop-derived peptide (aa 58-77) on right, but not scrambled control peptide on left, inhibits binding of mouse anti-human 2E2 antibody to hTIM-3. Lanes 1 and 2 show immunoblot of 2E2 antibody in the presence of scrambled control peptide, where lane 1 sample is exhausted CD4<sup>+</sup> T cells and lane 2 sample is doxycycline induced hTIM-3 expression on transfected Jurkat T cells. Lanes 3 and 4 show immunoblot of 2E2 antibody in the presence of hTIM-3 C-C' loop-derived peptide, where lane 3 sample is exhausted CD4<sup>+</sup> T cells and lane 4 sample is doxycycline induced hTIM-3 expression on transfected Jurkat T cells. Full-length blots are presented in Supplementary Figure 7. **c**, Structural alignment of hTIM-3 (green, PDB code 6DHB) with human TIM-1 (yellow, PDB code 5DZO) shows that hTIM-3 residues Ile118 and Met119 are replaced by aromatic residues Trp118 and Phe119 in hTIM-1. Human TIM-3 residues and loops are shown in green whereas hTIM-1 loops and residues are shown in yellow.

**Supplementary Figure 7.** Full-length blots related to Supplementary fig.6b, where scrambled control peptide lanes 1 and 2 represent lanes 1 and 2 of Supplementary fig.6b, and hTIM-3 C-C' loop-derived peptide lanes 1 and 2 represent lanes 3 and 4 of Supplementary fig.6b.

## References

1. Sabatos-Peyton, C. A. *et al.* Blockade of Tim-3 binding to phosphatidylserine and CEACAM1 is a shared feature of anti-Tim-3 antibodies that have functional efficacy. *Oncoimmunology* **7**:e1385690 (2018)

**Supplementary Table 1:** Human TIM-3 IgV domain secondary structure annotations by crystal structure and NMR

| <b>Secondary structure</b> | <b>Corresponding amino acids<br/>(Annotated by Crystal structure)</b> | <b>Corresponding amino acids<br/>(Predicted by NMR)</b> |
|----------------------------|-----------------------------------------------------------------------|---------------------------------------------------------|
| A strand                   | 24-VEYRA-28                                                           | 26-YRA-28                                               |
| B strand                   | 34-AY-35                                                              | 34-AYL-36                                               |
| C strand                   | 51-VCWVGK-55                                                          | 53-WGK-55 (partially assigned)                          |
| C' strand                  | 67-VLR-69                                                             | unassigned                                              |
| C'' strand                 | 75-VN-76                                                              | unassigned                                              |
| D strand                   | 82-YWL-84                                                             | unassigned                                              |
| First Helix                | 87-DFRK-90                                                            | 88-FR-89                                                |
| E strand                   | 95-LTI-97                                                             | 95-LTI-97                                               |
| Second Helix               | 101-TLAD-104                                                          | 102-LAD-104                                             |
| F strand                   | 106-GIYCCRI-111                                                       | 106-GIYCCRIQ-113                                        |
| G strand                   | 121-EKFNLKLVIK-130                                                    | 122-KFNLKLVI-129                                        |
